# Supplementary material
Source: publisher figshare collection journal article supplement (https://acs.figshare.com/ndownloader/files/24087759)
Supplement: Supplementary file 1 [file 24087759]

## Supporting information

# Large-scale Atomically Thin Monolayer 2H-MoS<sub>2</sub> Field Effect Transistors

*Nitin Babu Shinde,<sup>†</sup> Beo Deul Ryu,<sup>‡</sup> Kalaiyarasan Meganathan,<sup>†</sup> Bellarmine Francis,<sup>‡</sup>  
Chang-Hee Hong,<sup>‡</sup> S. Chandramohan,<sup>†</sup> and Senthil Kumar Eswaran<sup>†,§\*</sup>*

<sup>†</sup>2D Materials and Devices Laboratory (2DML), Sir C. V. Raman Research park,

Department of Physics and Nanotechnology, SRM Institute of Science and

Technology (SRMIST), Kattankulathur 603203, Chennai, India

<sup>‡</sup>School of Semiconductor and Chemical Engineering, Semiconductor Physics

Research Center, Chonbuk National University, Jeonju 54896, South Korea

<sup>§</sup>Nano Functional Materials Technology Centre, Department of Physics, Indian

Institute of Technology Madras, Chennai-600036, India

<sup>\*</sup>Nanotechnology Research Centre (NRC), SRM Institute of Science and Technology

(SRMIST), Kattankulathur 603203, Chennai, India

\*Corresponding author email: [senthile2@srmist.edu.in](mailto:senthile2@srmist.edu.in)

***MoS<sub>2</sub> growth and characterization:*** The MoS<sub>2</sub> films were deposited using gas-phase chemical vapor deposition (CVD) (Model: TCVD-100B, Graphene Square, South Korea) technique. The MoS<sub>2</sub> films were deposited on SiO<sub>2</sub> (300 nm)/Si (p<sup>++</sup>) using Bis(tertbutylimido)bis(dimethylamido) molybdenum, (N<sup>t</sup>Bu)<sub>2</sub>(NMe<sub>2</sub>)<sub>2</sub>Mo, and hydrogen sulfide (H<sub>2</sub>S) at a growth temperature of 850 °C and a reactor pressure of 10 Torr. The precursor flow was set as 100 and 3 sccm for Mo and S respectively. The (N<sup>t</sup>Bu)<sub>2</sub>(NMe<sub>2</sub>)<sub>2</sub>Mo bubbler was maintained at 45 °C. Thickness of the MoS<sub>2</sub> films was precisely manipulated from monolayer (1L) to ten layers (10 L) by controlling growth time from 4 min to 40 min. After the growth the films were allowed to cool rapidly in H<sub>2</sub>S environment. Room temperature Raman and photoluminescence measurements were carried out using LabRAM HR Evolution (HORIBA France) at an excitation laser wavelength of 532 nm with a power of 5 mW. X-ray photoelectron spectroscopy measurements were carried out using PHI VersaProbe III (ULVAC, Physical Electronics USA). Microstructural analysis was performed using Quanta 200 (FEI, Netherlands) field-emission scanning electron microscope with an accelerating voltage of 5.0 kV and a working distance of 9.3 mm. High-resolution transmission electron microscope images were acquired using Technai 20 (FEI, Netherlands).

***TEM specimen preparation:***

We have used a wet-transfer method to transfer the MoS<sub>2</sub> monolayers on to the copper grid. Initially, one edge of the monolayer MoS<sub>2</sub> deposited on SiO<sub>2</sub>/Si substrate was scratched using a sharp knife. Then the scratched side was slowly immersed into the diluted hydrofluoric acid (HF) in DI water (1: 10 ratio). Within 10 to 15 secs, the MoS<sub>2</sub> films were floating on the surface of HF solution. Then the films were washed by transferring in to fresh DI water for 3 times and finally scooped using copper grids. The specimens were dried in room temperature (30 oC) for 24 hrs before analyzing using TEM.

***MoS<sub>2</sub> FET fabrication and characterization:***

Standard photolithography was employed to fabricate bottom-gated MoS<sub>2</sub> monolayer field-effect transistors (FETs) on SiO<sub>2</sub>(300 nm)/Si (p<sup>++</sup>) with bilayer Au(100 nm)/Ti(5nm) as ohmic contact metals for the source and drain. Electrical performance of the monolayer MoS<sub>2</sub> FETs were tested with a fixed channel width (350  $\mu$ m) and varying channel lengths from 20 to 100  $\mu$ m using a probe station (Lakeshore PS100, USA) equipped with a semiconductor parameter analyzer (4200 SCS, KEITHLEY).

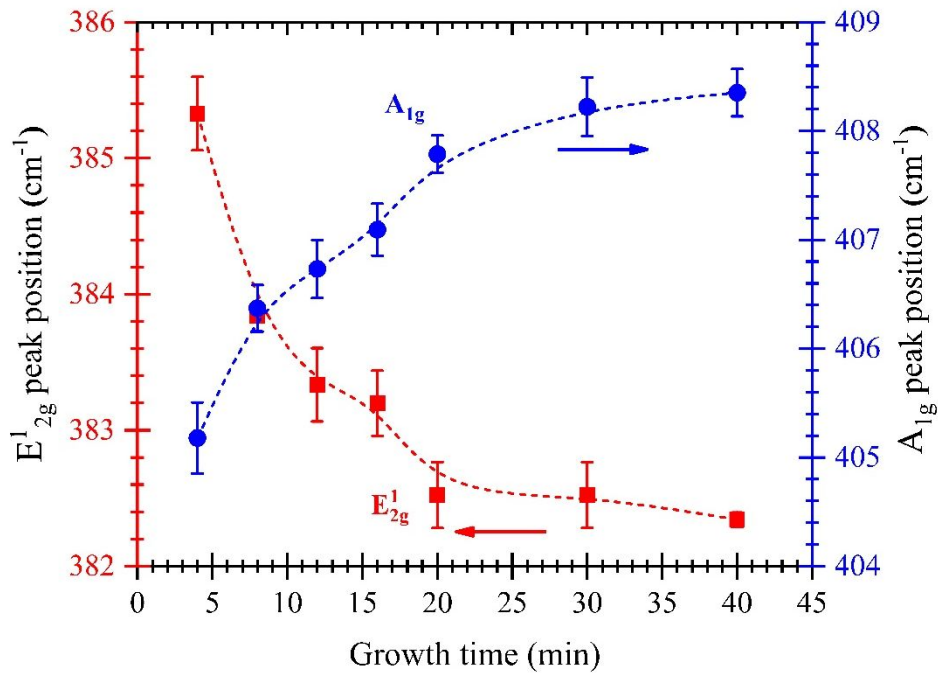

Figure S1. Dependence of the Raman vibrational mode positions (E<sub>12g</sub> and A<sub>1g</sub>) of the MoS<sub>2</sub> films deposited on SiO<sub>2</sub>/Si with a growth time varying from 4 to 40 min. The trend qualitatively explains increase in layer thickness with increase in growth time.

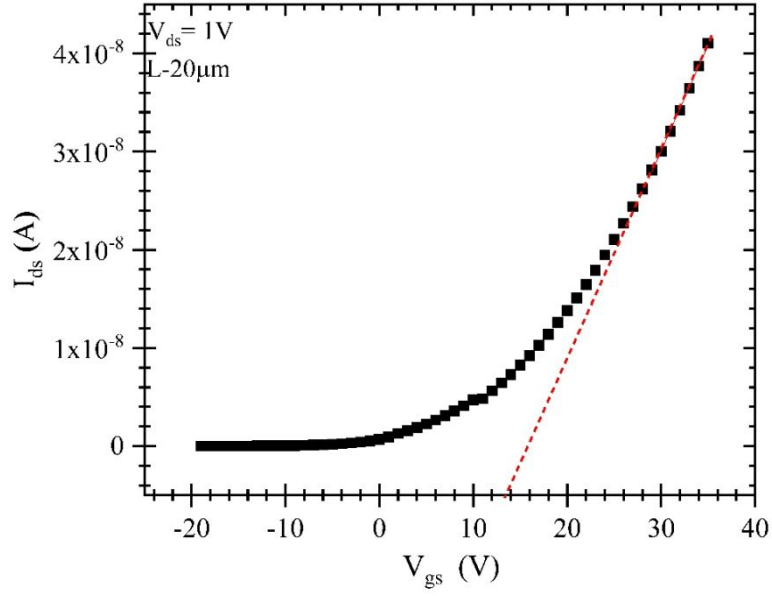

Figure S2. Transfer curve ( $I_{ds}$ - $V_{gs}$ ) obtained for  $V_{ds} = 1$  V for the FET device with channel length  $L = 20 \mu\text{m}$ . The threshold voltage ( $V_{th}$ ) is extracted from the intercept of the linear fit to the voltage axis.

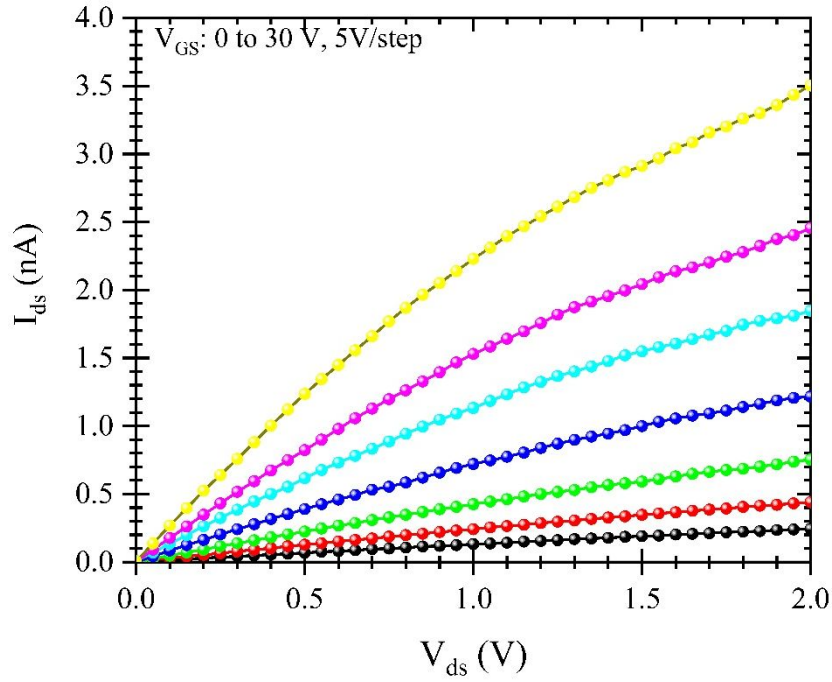

Figure S3. Output characteristics of the  $\text{MoS}_2$  FET with channel length  $L = 20 \mu\text{m}$  displaying saturation behavior of the current ( $I_{ds}$ ) above  $V_{ds} = 1$  V.

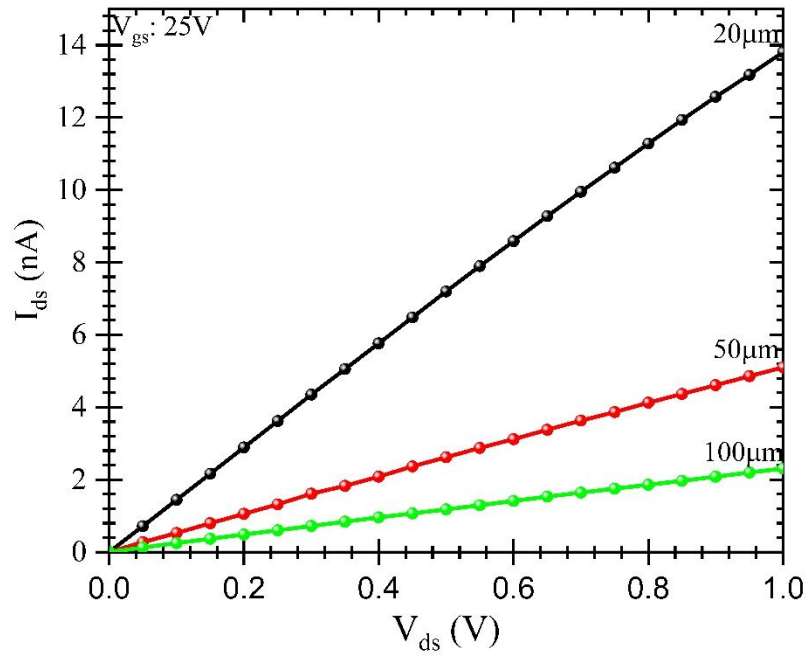

Figure S4. Out put characteristics ( $I_{ds}$ - $V_{ds}$ ) of the MoS<sub>2</sub> FET with various channel lengths ( $L=20, 50$  and  $100 \mu\text{m}$ ) at  $V_{GS}= 25\text{V}$ . It is evident that the current decreases with increase in channel length.

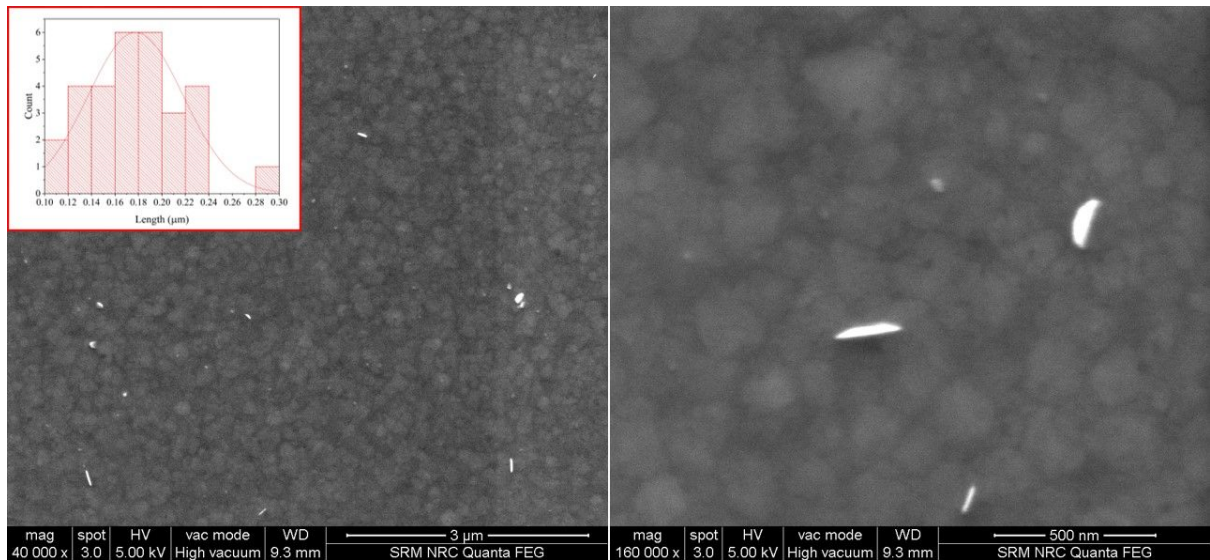

Figure S5. Field emission scanning electron microscope (FESEM) images of few layer MoS<sub>2</sub> grown on SiO<sub>2</sub>/Si substrate. The inset shows the histogram of grain size variation (100 nm to 200 nm) with average grain size  $\sim 180$  nm.

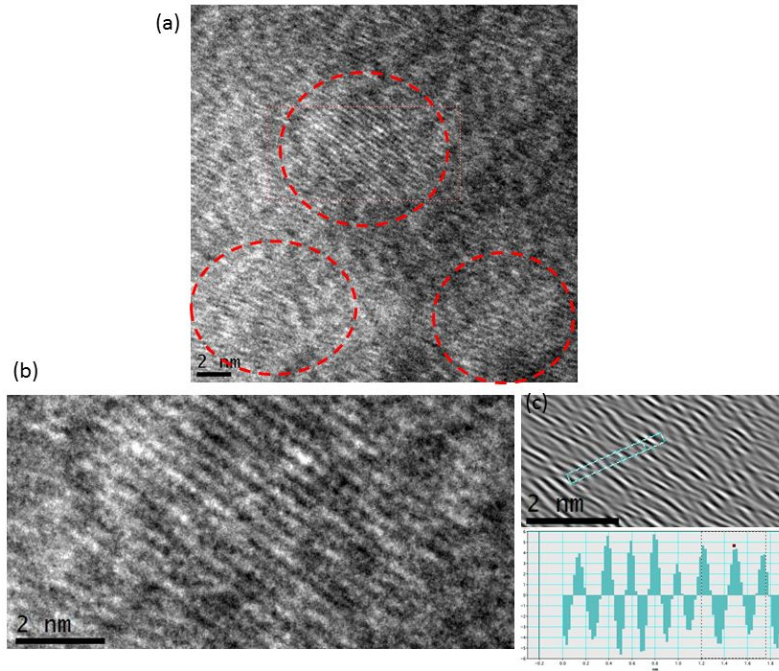

Figure S6. High-resolution transmission electron microscope (HRTEM) images of the monolayer MoS<sub>2</sub>. The d-spacing of the monolayer MoS<sub>2</sub> is estimated as  $\sim 0.324$  nm, using GATAN DM software.

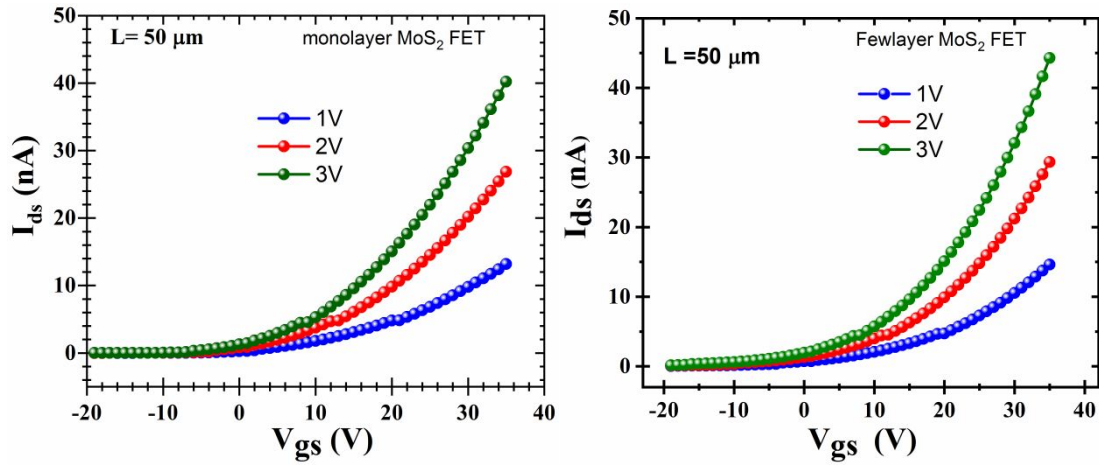

Figure S7. Transfer characteristics of the monolayer MoS<sub>2</sub> and few layer MoS<sub>2</sub> FETs for a fixed channel length of 50  $\mu\text{m}$ . It can be seen that both the devices show nearly same current values indicating the similar scattering mechanism in both monolayer and few layered samples.
